# Supplementary material for: Ultra-pH-responsive split i-motif based aptamer anchoring strategy for specific activatable imaging of acidic tumor microenvironment
Source: Royal Society of Chemistry journal article supplement (doi:10.1039/c8cc04420a), 2018-01-01
Supplement: c8cc04420a1.pdf [file c8cc04420a1.pdf]

## Electronic Supplementary Information (ESI)

### Ultra-pH-responsive split i-motif based aptamer anchoring strategy for specific activatable imaging of acidic tumor microenvironment

Yanli Lei, Xiaoxiao He, Jinlu Tang, Hui Shi,\* Dinggeng He, Lv'an Yan, Jianbo Liu, Yu Zeng and  
Kemin Wang\*

State Key Laboratory of Chemo/Biosensing and Chemometrics, College of Biology, College of  
Chemistry and Chemical Engineering, Hunan University, Key Laboratory for Bio-Nanotechnology and  
Molecular Engineering of Hunan Province, Changsha 410082, China

\* Corresponding authors. Email: kmwang@hnu.edu.cn; huishi\_2009@hnu.edu.cn.

### Contents

|                            |     |
|----------------------------|-----|
| Experimental Section ..... | S-2 |
| Supporting Table .....     | S-5 |
| Supporting Figures .....   | S-6 |

## Experimental Section

**Chemicals and Materials.** All the DNA probes used in this study were custom-designed and then synthesized by Sangon Biotechnology Co. Ltd. (China). Before use, the DNA probes were purified with high performance liquid chromatography (HPLC) and further identified using mass spectrometry, by Sangon Biotechnology Co. Ltd. (China). Sequences of the oligos are listed in Table S1. The modification strategies of Cy5 fluorophore (A) and BHQ2 quencher (B) to DNA strands are as follows:

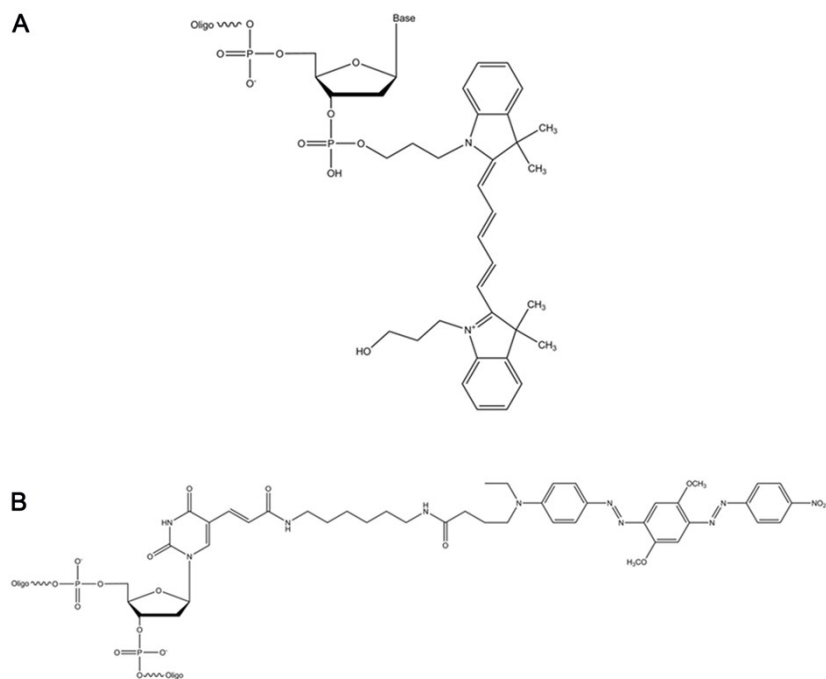

Cell medium RPMI 1640 was obtained from Thermo Fisher Scientific (MA, U.S.A). Optimal Cutting Temperature Compound (OCT) was obtained from SAKURA (Torrance, U.S.A). All other reagents were of the highest grade available and obtained from Sinopharm Chemical Reagent Co. Ltd. (Shanghai, China). Deionized water was produced by the Milli-Q ultrapure water system. A stock phosphate buffer (0.1 M PB) with different pH value was prepared by mixing 100 mM  $\text{Na}_2\text{HPO}_4$  and 100 mM  $\text{NaH}_2\text{PO}_4$  in a proper ratio. Phosphate buffered saline (0.01 M PBS) was obtained from the corresponding PB by ten-fold dilution, and then added with 130 mM NaCl, 4.6 mM KCl and 5 mM  $\text{MgCl}_2$ . The pH of each buffer was calibrated with a Thermo Scientific Orion 3 Star pH-meter (MA, U.S.A).

**Cells.** SMMC-7721 cells (human hepatoma cell line), HeLa cells (human cervical cancer cell line) and CCRF-CEM cells (T lymphoblast, human acute lymphoblastic leukemia) used in this study were obtained from the Cell Bank of the Committee on Type Culture Collection of the Chinese Academy of

Sciences (Shanghai, China). Ramos cells (B lymphocyte, human Burkitt's lymphoma) were purchased from the Cancer Institute & Hospital of Chinese Academy of Medical Sciences (Beijing, China). Cells were cultured in RPMI 1640 medium supplemented with 13% fetal bovine serum (FBS, heat inactivated) and 100 IU/mL penicillin-streptomycin. All cells were maintained at 37 °C in humidified conditions equilibrated with 5% CO<sub>2</sub>.

**Animals.** 4-week-old male athymic BALB/c (Balb/C-nu) mice were obtained from Hunan SJA Laboratory Animal Co. Ltd. (China). Tumor-bearing mice were prepared by subcutaneously injecting  $5 \times 10^6$  *in vitro*-propagated cancer cells into the right legs of nude mice. Tumors were then allowed to grow to 0.5-2 cm in diameter for 1-2 months. All animal operations were in accord with institutional animal use and care regulations, according to protocol No. SCXK (Xiang) 2013-0001, approved by the Laboratory Animal Center of Hunan Province.

**Preparation of pH-AAP.** The oligos (Split-I and Apt-C) were firstly mixed at a molar ratio of 1.5:1 in PBS (pH 7.4). Then, the mixture was heated at 95 °C for 4 min, cooled immediately to 4 °C for 10 min, and finally left hybridizing at 20 °C for 40 min to form pH-AAP. Control probes were prepared using the same procedure.

**CD Measurements.** 15 µL of probes (pH-AAP-Z, Split-I or ZY11-C) were added into 285 µL of PBS with different pH values, with a followed incubation for 1 h at 25 °C. Then, circular dichroism (CD) spectra of each DNA probe were acquired at room temperature with a Bio-Logic MOS-500 CD spectrophotometer (France). Three scans from 220 to 340 nm were accumulated and averaged. In each case, the background of the buffer solution was subtracted from the CD data. The final concentration of pH-AAP-Z was 2.5 µM, and the amounts of Split-I and ZY11-C were equivalent to that in the pH-AAP-Z sample.

**Fluorescence Experiments.** The pH-AAP probes (final concentration: 100 nM) were treated in PBS with different pH values (pH 5.6-7.8), and then left for incubation for 1 h at 25 °C. The fluorescence spectra were determined on an F-7000 fluorescence spectrophotometer (Hitachi, Japan) by measuring the signal of Cy5. To investigate the fluorescence stability of Cy5 at different pH, Cy5 labeled ZY11-C was processed in the same way as the pH-AAP. (Ex: 620 nm; Em: 640-740 nm).

**Flow Cytometry Assays.** Generally,  $1.5 \times 10^5$  cells were incubated with DNA probes (200 nM) in 150 µL of PBS (pH 7.4 or pH 6.4) at 25 °C for 1 h in the dark and then immediately determined with a Gallios cytometer (Beckman Coulter, USA) by counting 20,000 events.

**Laser Scanning Confocal Microscopy Imaging.** Fluorescent images were acquired on a TI-E+A1 SI confocal microscope (Nikon, Japan) with a 60× oil immersion objective. To investigate the specific binding and pH-responsiveness,  $1 \times 10^5$ /mL of cells in different pH buffers were incubated with DNA probes (250 nM) at 25 °C for 1 h, and then resuspended in PBS (pH 7.4) for microscopic observation after twice wash.

***In Vivo* and Tissue Slice Fluorescence Imaging.** Before imaging, tumor-bearing BALB/c nude mice were anesthetized with anesthetic. Once the mice were anesthetized to be motionless, simultaneous injections of 60  $\mu$ L of PBS (pH 7.4) containing 75 pmol of pH-AAP were administrated intratumorally into tumor sites and the corresponding normal muscle tissues. Subsequently, fluorescence imaging was taken at certain time points by an IVIS Lumina II *in vivo* imaging system (Caliper Life Science, U.S.A.).

For tissue slice imaging, tumor-bearing mice were firstly killed to obtain tumor tissues and normal muscle tissues. Next, excised tumor tissues or normal tissues were embedded in OCT and rapidly frozen to -20 °C. After cutting into 8  $\mu$ m-sections using CM1850 (Leica, Germany), the frozen samples were quickly adsorbed on glass slides for further use. For sensing acidic tumor microenvironment, the small volume of solution (6  $\mu$ L) with a probe concentration of as high as 2  $\mu$ M was added and incubated with slices for 1 h at 25 °C. Subsequently, the central parts of the tissue slices were immediately evaluated using a TI-E+A1 SI confocal microscope (Nikon, Japan) with a 60× oil immersion objective.

**Table S1.** All of the oligonucleotides used in this work. <sup>a</sup>

| Probe                  | Name                   | Sequence (5'-3')                                                                           |
|------------------------|------------------------|--------------------------------------------------------------------------------------------|
| 12-6C-AAT <sup>b</sup> | cDNA-1                 | <b>CCACACGCAGGT</b> -Cy5                                                                   |
|                        | Split-I-1              | CCCCCAATCCCCC <i><u>7</u></i> (-BHQ2) <b>ACCTGCGTGTGG</b> CCCCCAATCCCCC                    |
| 10-6C-AAT <sup>b</sup> | cDNA-2                 | <b>ACACGCAGGT</b> -Cy5                                                                     |
|                        | Split-I-2              | CCCCCAATCCCCC <i><u>7</u></i> (-BHQ2) <b>ACCTGCGTGT</b> CCCCCAATCCCCC                      |
| 10-6C-T <sup>b</sup>   | cDNA-2                 | <b>ACACGCAGGT</b> -Cy5                                                                     |
|                        | Split-I-3              | CCCCCTCCCCC <i><u>7</u></i> (-BHQ2) <b>ACCTGCGTGT</b> CCCCCTCCCCC                          |
| 10-5C-AAT <sup>b</sup> | cDNA-2                 | <b>ACACGCAGGT</b> -Cy5                                                                     |
|                        | Split-I-4              | CCCCAATCCCCC <i><u>7</u></i> (-BHQ2) <b>ACCTGCGTGT</b> CCCCAATCCCCC                        |
| pH-AAP-Z               | ZY11-C                 | <u>ACGCGCGCGCGCATAGCGCGCTGAGCTGAAGATCGTACCGTGAGCGCGT</u><br><i>TTTTTTTTACACGCAGGT</i> -Cy5 |
|                        | Split-I-3              | CCCCCTCCCCC <i><u>7</u></i> (-BHQ2) <b>ACCTGCGTGT</b> CCCCCTCCCCC                          |
| pH-AAP-A               | AS1411-C               | <u>GGTGGTGGTGGTGTGGTGGTGGTGGTTTTTTTTACACGCAGGT</u> -Cy5                                    |
|                        | Split-I-3              | CCCCCTCCCCC <i><u>7</u></i> (-BHQ2) <b>ACCTGCGTGT</b> CCCCCTCCCCC                          |
| pH-AAP-S               | Sgc8c-C                | <u>ATCTAACTGCTGCGCCGCCGGGAAAATACTGTACGGTTAGATTTTTTTTTA</u><br><b>CACGCAGGT</b> -Cy5        |
|                        | Split-I-3              | CCCCCTCCCCC <i><u>7</u></i> (-BHQ2) <b>ACCTGCGTGT</b> CCCCCTCCCCC                          |
| pH-AAP-T               | TD05-C                 | <u>AACACCGTGGAGGATAGTTCGGTGGCTGTTACAGGGTCTCCTCCCGGTGTT</u><br><i>TTTTTTACACGCAGGT</i> -Cy5 |
|                        | Split-I-3              | CCCCCTCCCCC <i><u>7</u></i> (-BHQ2) <b>ACCTGCGTGT</b> CCCCCTCCCCC                          |
|                        | Split-Ctl <sup>c</sup> | AAATCGAGTATGT <i><u>7</u></i> (-BHQ2) <b>ACCTGCGTGT</b> TCAATCTAAGTCAA                     |
|                        | Ctl-C <sup>d</sup>     | <u>N<sub>46</sub>TTTTTTTTTACACGCAGGT</u> -Cy5                                              |

<sup>a</sup> In all sequences, the aptamer region is shown underlined; the double helix region is shown in bold; and poly T shown in italic is inserted to reduce the steric resistance or facilitate labeling.

<sup>b</sup> For naming these four sets of split i-motif probes, the number of base pairs in the dsDNA region is shown as the first set of numbers; the length of C-tract in i-motif is displayed as the second group; and the sequence of i-loop in i-motif is presented in the last.

<sup>c</sup> The overhangs of Split-Ctl are designed with arbitrary base composition instead of C-rich sequences, which thus can't form i-motif at low pH. Accordingly, the hybrid of Split-Ctl and Apt-C is used as the control probe pH-Ctl-Apt. That is to say, pH-Ctl-Z is assembled from Split-Ctl and ZY11-C; pH-Ctl-A is assembled from Split-Ctl and AS1411-C; pH-Ctl-S is assembled from Split-Ctl and Sgc8c-C; pH-Ctl-T is assembled from Split-Ctl and TD05-C.

<sup>d</sup> The aptamer domain of Ctl-C is designed with arbitrary base composition such that it has little affinity to target cells. Accordingly, the hybrid of Split-Ctl and Ctl-C is used as the control probe D-Ctl.

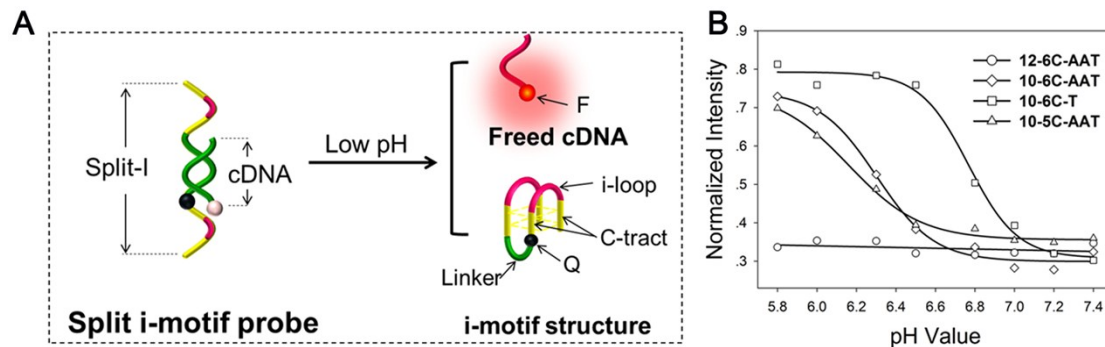

**Fig. S1** Design and sequence optimization of split i-motif probes. (A) The structural response of split i-motif probes at acidic pH. (“C-tract” = continuous stretch of cytidines; “i-loop” = a stretch of A or T bases between the C-tracts.) (B) Investigation of the pH-sensitivity of split i-motif probes with different sequences (100 nM) as a function of pH values at 25 °C. The four probes vary in the length of double helix region, the length of C-tract and the sequence of i-loop. The transition midpoints ( $pH^T$ ) of probes 10-6C-AAT, 10-6C-T, and 10-5C-AAT were calculated to be  $6.37 \pm 0.04$ ,  $6.77 \pm 0.03$ , and  $6.16 \pm 0.05$ , respectively.

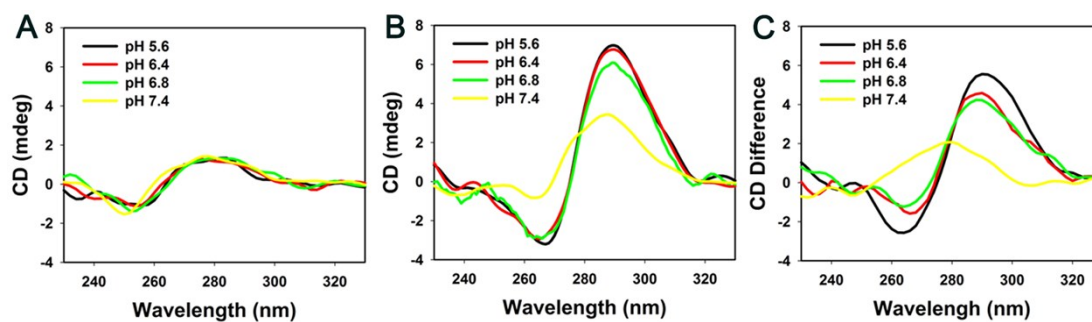

**Fig. S2** Circular dichroism (CD) spectra of different DNA probes recorded in 10 mM PBS buffer at different pH at room temperature. (A) ZY11-C only (2.5  $\mu$ M); (B) Split-I-3 only (3.75  $\mu$ M); (C) difference spectra by subtracting CD spectra of ZY11-C from CD spectra of pH-AAP-Z shown in Fig. 1A. The CD spectral profile characterized with a negative band centered at  $\sim$ 265 nm and a positive band centered at  $\sim$ 290 nm implies the formation of i-motif structures.<sup>8b, 10a</sup> The difference spectra illustrated the folding of i-motif structures by removing interference from other structure transforms.

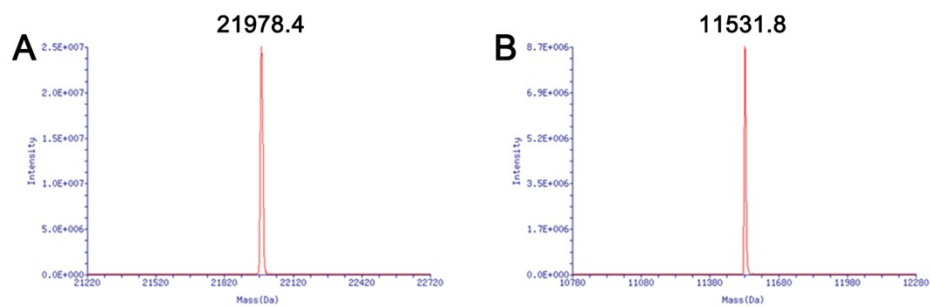

**Fig. S3** Mass spectrometry characterization results of (A) Cy5 labeled ZY11-C and (B) BHQ2 labeled Split-I-3, provided by Sangon Biotechnology Co. Ltd. (China). The results accord well with the calculated mass values of 21978.58 and 11530.44, respectively, and one single peak detected for each probe means a high purity after HPLC purification.

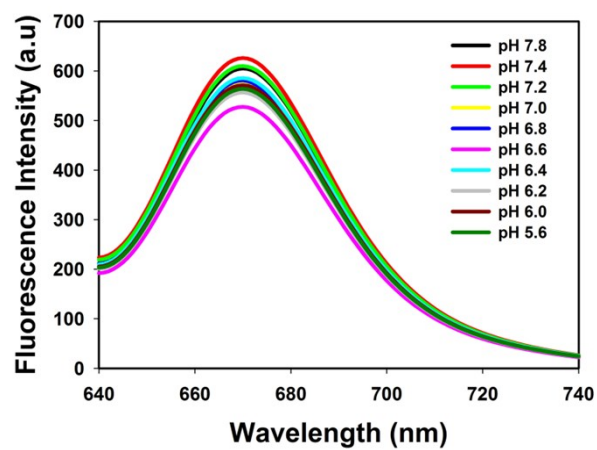

**Fig. S4** Fluorescence spectra of Cy5 labeled ZY11-C (100 nM) in 10 mM PBS buffer with different pH values at 25 °C.

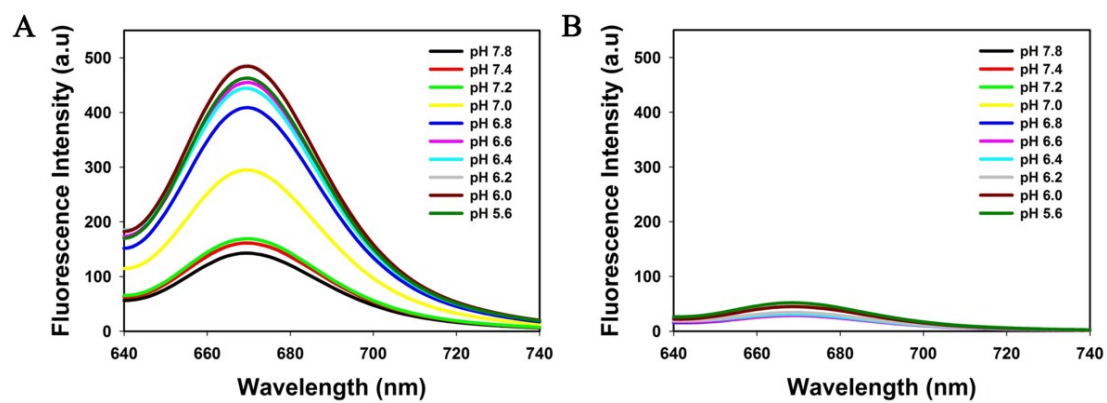

**Fig. S5** Fluorescence spectra of (A) pH-AAP-Z and (B) pH-Ctl-Z over the pH range of 5.6–7.8. Each probe was incubated in 10 mM PBS buffer at 25 °C with a final concentration of 100 nM.

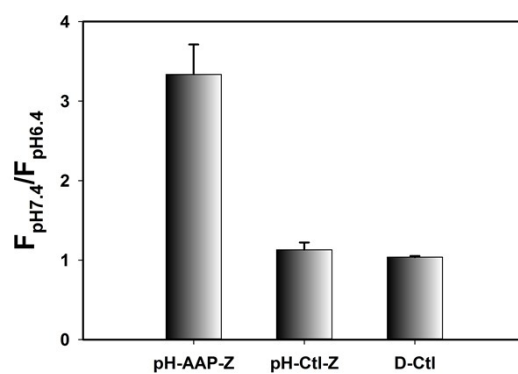

**Fig. S6** The corresponding histogram of the fluorescence intensity ratios of SMMC-7721 cells at pH 7.4 to that at pH 6.4 for different probes in Fig. 1C. The error bars represent standard deviations from three repeated experiments.

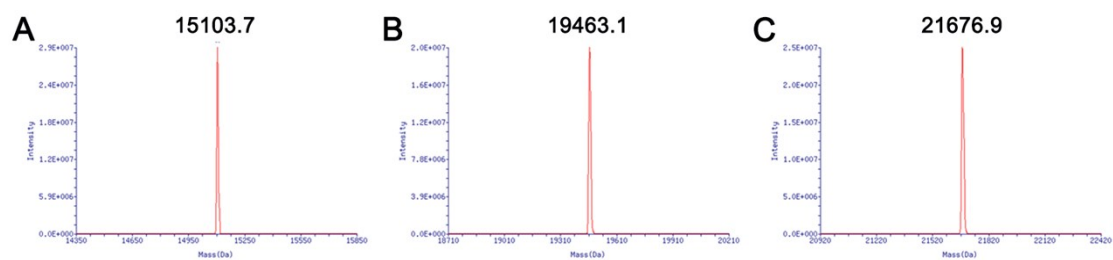

**Fig. S7** Mass spectrometry characterization results of (A) Cy5 labeled AS1411-C, (B) Cy5 labeled Sgc8c-C and (C) Cy5 labeled TD05-C, provided by Sangon Biotechnology Co. Ltd. (China). The results accord well with the calculated mass values of 15101.12, 19463.01 and 21676.38, respectively, and one single peak detected for each probe means a high purity after HPLC purification.

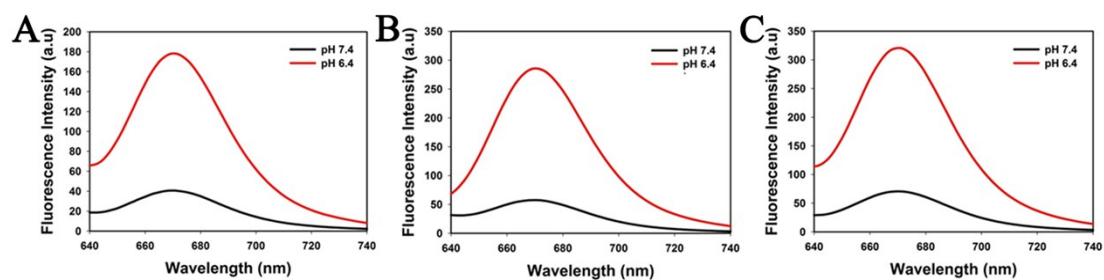

**Fig. S8** Fluorescence spectra of (A) pH-AAP-A, (B) pH-AAP-S and (C) pH-AAP-T in 10 mM PBS with different pH values at 25 °C. Probe concentration: 100 nM.

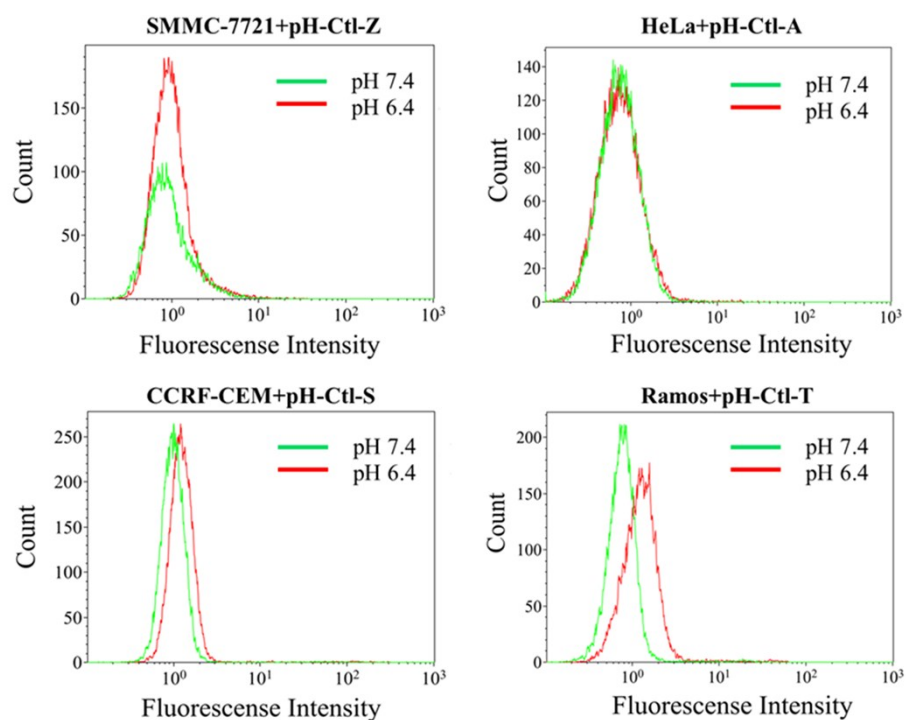

**Fig. S9** Flow cytometry assays of SMMC-7721, HeLa, CCRF-CEM and Ramos cells after incubation with their corresponding control probes (pH-Ctl-Z, pH-Ctl-A, pH-Ctl-S and pH-Ctl-T), respectively. Cells and probes were incubated in 10 mM PBS buffer with different pH values at 25 °C. Probe concentration: 200 nM.

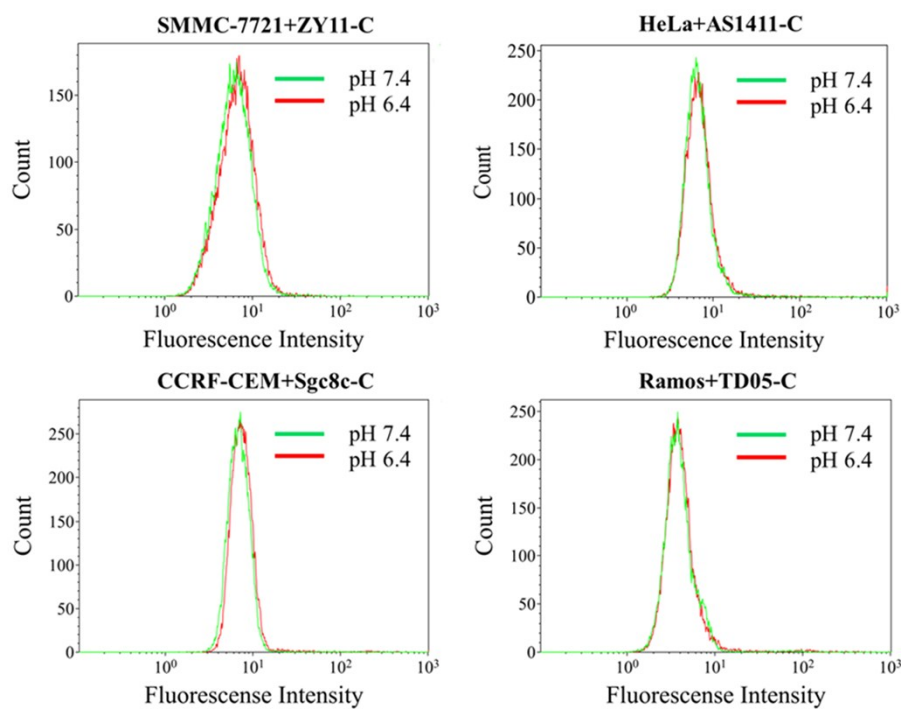

**Fig. S10** Flow cytometry assays of SMMC-7721, HeLa, CCRF-CEM and Ramos cells after incubation with their corresponding Cy5-labeled Apt-C probes (ZY11-C, AS1411-C, Sgc8c-C and TD05-C), respectively. Cells and probes were incubated in 10 mM PBS buffer with different pH values at 25 °C. Probe concentration: 200 nM.

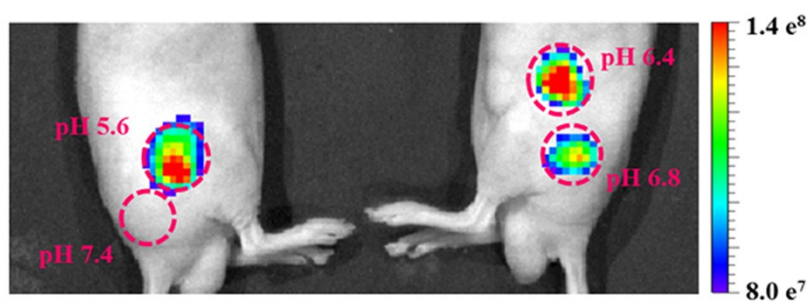

**Fig. S11** *In vivo* fluorescence imaging of simulated acidic environments, which were prepared by incubating pH-AAP-Z (75 pmol) at different pH for an hour and then subcutaneously injecting into the nude mouse.

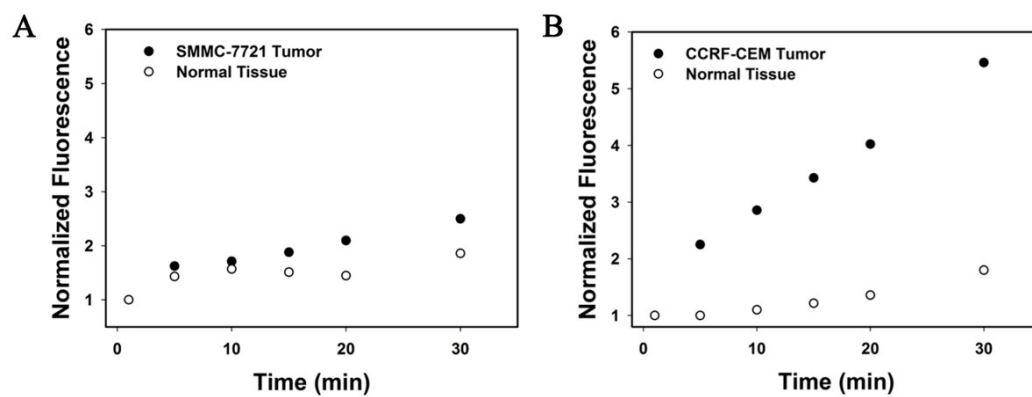

**Fig. S12** Time-lapse quantitative analysis of the normalized fluorescence intensities in tumor areas and normal tissue regions of (A) the SMMC-7721 tumor-bearing mouse injected with pH-AAP-Z and (B) the CCRF-CEM tumor-bearing mouse injected with pH-AAP-S.

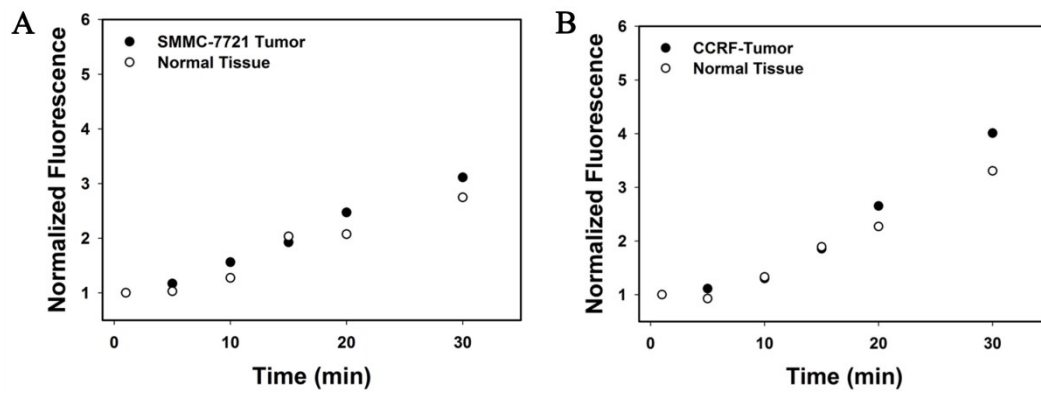

**Fig. S13** Time-lapse quantitative analysis of the normalized fluorescence intensities in tumor areas and normal tissue regions of (A) SMMC-7721 tumor-bearing mouse and (B) CCRF-CEM tumor-bearing mouse, after injection of the control D-Ctl probe.
